# Supplementary figures and images for: Dual-functionalized graphene oxide induces M2a and M2c macrophage polarization to orchestrate inflammation and tissue remodeling
Source: Royal Society of Chemistry journal article supplement (doi:10.1039/d5tb00474h), 2025-01-01

A

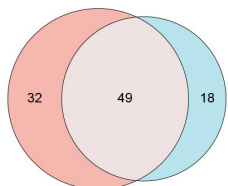

M2a(GPPF/pIL4) vs control(M0) M2c(GPPF/pIL10) vs control(M0)

B

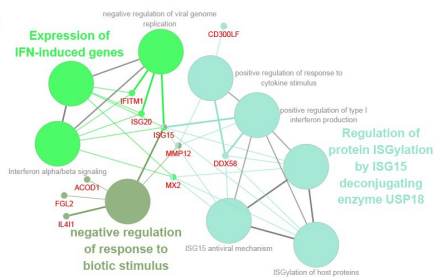

C

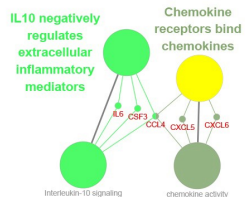

D

Biological process

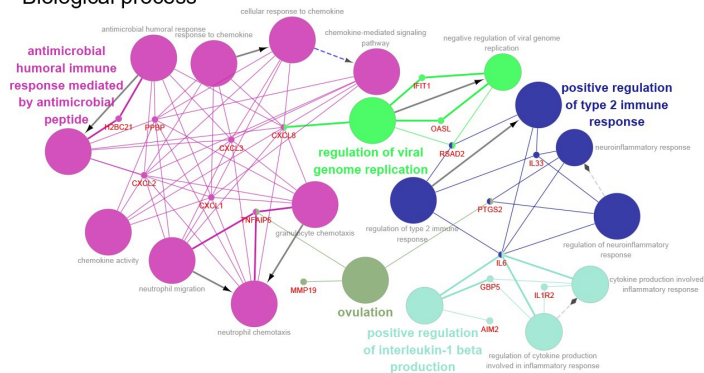

E

Wikipathways

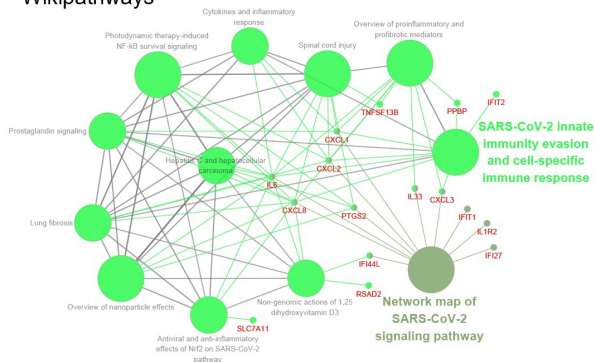

Supplement: d5tb00474h4.pdf [file d5tb00474h4.pdf]

A

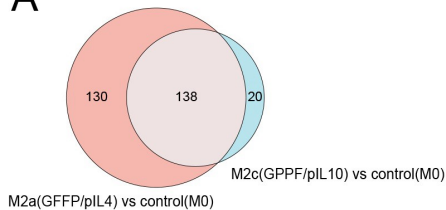

B

Biological process

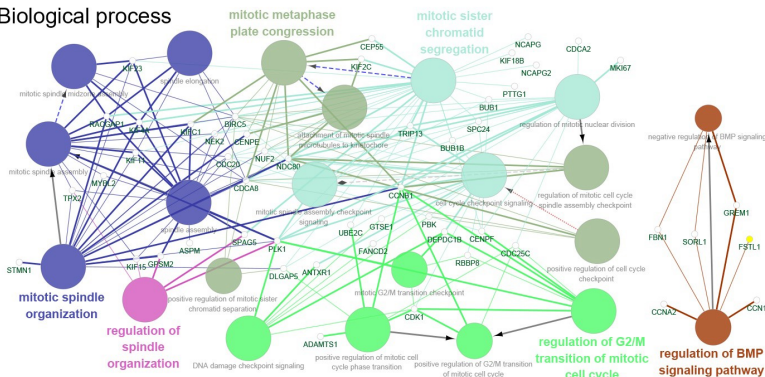

C

Wikipathways

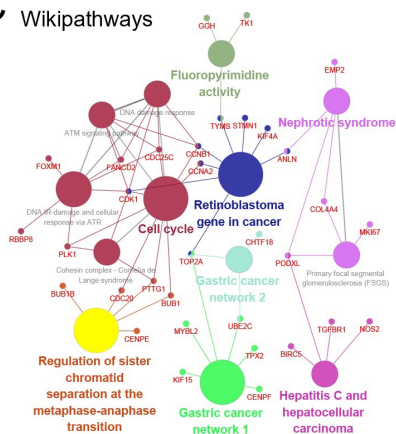

Supplement: d5tb00474h5.pdf [file d5tb00474h5.pdf]
